# Supplementary material for: Antimicrobials and Antibiotic Resistance Genes in Water Bodies: Pollution, Risk, and Control
Source: Frontiers journal article supplement (doi:10.3389/fenvs.2022.830861), 2022-04-28
Supplement: Table_1.DOCX [file Table_1.DOCX]

**Supplementary File 1:** Timeline of Antibiotic Discovery, Clinical Introduction, and Detection of Antibiotic Resistance.

| **S. No.** | **Antibiotics** | **Discovery** | **Clinically Introduced/ FDA approved** | **Detection of antibiotic resistance (RF)** |
| --- | --- | --- | --- | --- |
|  | Penicillin | 1920-1930 | 1940-1950 | 1940 |
|  | Sulfonamides | 1930-1940 | 1930-1940 | 1940-1950 |
|  | Aminoglycoside | 1940-1950 | 1940-1950 | 1940-1950 |
|  | Nitrofurans* | 1940-1950 | 1950-1960 | - |
|  | Bacitracin | 1940-1950 | 1950-1960 | 1950-1960 |
|  | Cephalosporin | 1940-1950 | 1960-1970 | 1950-1960 |
|  | Tetracycline | 1940-1950 | 1940-1950 | 1950-1960 |
|  | Amphenicols | 1940-1950 | 1940-1950 | 1950-1960 |
|  | Pleuromutilins | 1940-1950 | 2000-2010 | 1980-1990 |
|  | Macrolides | 1950-1960 | 1950-1960 | 1950-1960 |
|  | Streptogramins | 1950-1960 | 1990-2000 | 1950-1960 |
|  | Cycloserine | 1950-1960 | 1960-1970 | 1960-1970 |
|  | Novobiocin | 1950-1960 | 1960-1970 | 1960-1970 |
|  | Glycopeptides | 1950-1960 | 1950-1960 | 1980-1990 |
|  | Fusidic Acid | 1960-1970 | 1960-1970 | 1960-1970 |
|  | Lincosamides | 1960-1970 | 1960-1970 | 1970-1980 |
|  | Quinolones | 1960-1970 | 1960-1970 | 1960-1970 |
|  | Nitroimizadoless | 1960-1970 | 1960-1970 | 1970-1980 |
|  | Trimethoprim | 1960-1970 | 1960-1970 | 1980-1990 |
|  | Rifampicin | 1960-1970 | 1970-1980 | 1990-2000 |
|  | Fosfomycin | 1960-1970 | 1970-1980 | 1970-1980 |
|  | Mupirocin | 1970-1980 | 1980-1990 | 1980-1990 |
|  | Carbapenems | 1970-1980 | 1980-1990 | 1980-1990 |
|  | Oxazolidinones | 1970-1980 | 1990-2000 | 2000-2010 |
|  | Fluoroquinolones | 1970-1980 | 1980-1990 | 1980-1990 |
|  | Monobactams | 1970-1980 | 1980-1990 | 1980-1990 |
|  | Glycylcycline | 1990-2000 | 2000-2010 | 2000-2010 |
|  | Ketolides | 2000-2010 | 2000-2010 | 2000-2010 |
|  | Diarylquinolines | 2000-2010 | 2010-2020 | 2000-2010 |
| No reports for resistance till 2020*  **Source:** World Bank. (2019). Pulling Together to Beat Superbugs Knowledge and Implementation Gaps in Addressing Antimicrobial Resistance. | | | | |
