# Supplementary material for: Antimicrobials and Antibiotic Resistance Genes in Water Bodies: Pollution, Risk, and Control
Source: Frontiers journal article supplement (doi:10.3389/fenvs.2022.830861), 2022-04-28
Supplement: Table_2.DOCX [file Table_2.DOCX]

**Supplementary File 2: Source of Antimicrobial Resistance (AMR) Observed in Microbes.**

|  | **Intrinsic** | **Acquired** |
| --- | --- | --- |
| **Definition** | - Occurs naturally (natural trait) - Species or genus-specific | - A strain that develops resistance to an antimicrobial to which it was previously susceptible - Naturally, present only in certain strains of a species or genus |
| **Mechanisms of antimicrobial resistance acquisition** | Inherent structural or functional characteristics of the bacteria that allow it to tolerate an antimicrobial substance | Vertical gene transmission   - - Spontaneous gene mutation   - Induced gene mutation   Horizontal gene transfer/mutation   - - Bacterial transformation   - Bacterial transduction   - Bacterial conjugation |
| Adapted from: Food and Agriculture Organization of the United Nations Rome, 2016: Available at vhttp://www.fao.org/3/i6209e/i6209e.pdf. | | |
