# Supplementary material for: Antimicrobials and Antibiotic Resistance Genes in Water Bodies: Pollution, Risk, and Control
Source: Frontiers journal article supplement (doi:10.3389/fenvs.2022.830861), 2022-04-28
Supplement: Table_3.DOCX [file Table_3.DOCX]

| **Supplementary File 3A: Antimicrobials, ARBs and ARGs in different water bodies** | | | | | | | | | | | | |
| --- | --- | --- | --- | --- | --- | --- | --- | --- | --- | --- | --- | --- |
| **FRESH AND WASTE WATER** | | | | | | | | | | | | |
| **S. No.** | | **Antimicrobials** | **Concent-rations** | | **ARGs** | | **Bacteria** | | **Environmental**  **Factors** | | **Reference** | |
|  | | **Streptomycin** | 2700-3400 ng/L | | NA | | NA | | NA | | [1] | |
|  | | **Gentamycin** | 1600-1400 ng/L | | *aaaC2, blaSHV, floR, ermA, mefA, sulI, sulII, tetA, tetC, tetO, tetW, int1* | | *E. coli, E. faecium, A. hydrophyla, A. caviae, Streptococcus, C. perfrigens, Faecalibacterium, A. sobria, A. butzleri, Enterobacter, Serratia* | | NA | | [1,2] | |
|  | | **Amikacin** | 1200-2300 ng/L | | NA | | NA | | NA | | [1] | |
|  | | **Amoxicillin** | 3800-6400 ng/L | | *blaCTX, blaTEM, blaOXA, blaSHV, tetA, teteB, teteO, tetM, tetW, tetQ, ermB, emrC,ermF, qnrS, sulI, sulII, vanA, mecA* | | NA | | NA | | [3,4,24] | |
|  | | **Penicillin** | 29 ng/L | | *blaCTX, blaTEM, blaOXA, blaSHV, tetA, teteB, teteO, tetM, tetW, tetQ, ermB, emrC,ermF, qnrS, sulI, sulII, vanA,* *mecA* | | NA | | NA | | [4,5] | |
|  | | **Cefuroxime** | 49-24380 ng/L | | NA | | NA | | NA | | [6] | |
|  | | **Vancomycin** | 61-249 ng/L | | *floR,, aaaC2, blaSHV, ermA, mefA, sulI, sulII, tetA, tetC, tetO, tetW, int1* | | *E. coli, E. faecium, A. hydrophyla, A. caviae, Streptococcus, C. perfrigens, Faecalibacterium, A. sobria, A. butzleri, Enterobacter, Serratia* | | NA | | [7,2,24] | |
|  | | **Erythromycin** | 9-586 ng/L | | *mefA, aaaC2, int1, blaSHV, floR, ermA, sulI, sulII, tetA, tetC, tetO, tetW,* | | *E. coli, E. faecium, A. hydrophyla, A.*  *caviae, Streptococcus, C. perfrigens, Faecalibacterium, A. sobria, A. butzleri, Enterobacter, Serratia* | | NA | | [4,2] | |
|  | | **Ciprofloxacin** | 0.82-323 ng/l | | *aaaC2, sulI, blaSHV, floR, tetC, ermA, mefA, sulII, tetA, tetO, tetW, int1* | | *E. coli, E. faecium, A. hydrophyla, A. caviae, Streptococcus, C. perfrigens, Faecalibacterium, A. sobria, A. butzleri, Enterobacter, Serratia* | | NA | | [8,9,2,16,26] | |
|  | | **Ofloxacin** | 11.1-13625 ng/L | | *sulII, tetA, aaaC2, floR, blaSHV, ermA, mefA, sulI, tetC, tetO, tetW, int1* | | *E. coli, E. faecium, A. hydrophyla, A.*  *caviae, Streptococcus, C. perfrigens, Faecalibacterium, A. sobria, A. butzleri, Enterobacter, Serratia* | | NA | | [10,4,2,17] | |
|  | | **Norfloxacin** | 11.2-367 ng/l | | *int1, int2, sul1, sul2, tetA, tetB, tetE, tetW, tetM, tetZ,* | | NA | | NA | | [9,10,4,17] | |
|  | | **Trimethoprim** | 100-730.19 ng/L | | *sulII, tetA, aaaC2, floR, blaSHV,* *ermA, mefA, sulI, tetC, tetO, tetW, int1* | | *E. coli, E. faecium, A. hydrophyla, A.*  *caviae, Streptococcus, C. perfrigens, Faecalibacterium, A. sobria, A. butzleri, Enterobacter, Serratia* | | NA | | [7,2] | |
|  | | **Sulfamethazine** | 220-4010 ng/L | | NA | | NA | | NA | | [12,7] | |
|  | | **Doxycycline** | 1.8-264 ng/L | | *blaCTX, blaTEM, blaOXA, blaSHV, tetA, teteB, teteO, tetM, tetW, tetQ, ermB, emrC,ermF, qnrS, sulI, sulII, vanA, mecA* | | NA | | NA | | [13,4] | |
|  | | **Tetracycline** | 58-1960 ng/L | | *blaTEM, mecA, vanA, strA, strB, aadA, int1* | | *Lactococcus, Bacillus, Cloacibacterium, Hydrogenophaga,Polynucleobacte, Acidovorax, Cloacibacterium, Sulfurospirillum,* | | Electrical conductivity,Temperature, pH and Dissolved oxygen | | [14] | |
|  | | **Sulfadiazine** | 2.1-23 ng/L | | NA | | NA | | NA | | [15] | |
|  | | **Sulfdimide** | 1.2-23.5 ng/L | | NA | | NA | | NA | | [16] | |
|  | | **Sulfamethoxazole** | 2.0-40.6 ng/L | | NA | | NA | | NA | | [16] | |
|  | | **Enrofloxacin** | 5.6-21.5 ng/L | | NA | | NA | | NA | | [17] | |
|  | | **Erythromycin** | 3.5- 126 ng/L | | NA | | NA | | NA | | [16] | |
|  | | **Roxithromycin** | 1.5-12.0 ng/L | | NA | | NA | | NA | | [17] | |
|  | | **Methicillin** | 247-420 ng/L | | NA | | NA | | NA | | [18] | |
|  | | **Ampicillin** | 3920 ng/l | | NA | | NA | | NA | | [25] | |
|  | | **Azithromycin** | 2500 ng/l | | NA | | NA | | NA | | [26] | |
|  | | **Ceftazidime** | 2430 ng/l | | NA | | NA | | NA | | [26] | |
|  | | **Meropenem** | 433.6 ng/l | | NA | | NA | | NA | | [27] | |
|  | | **Cefixime** | 318.6 ng/l | | NA | | NA | | NA | | [28] | |
|  | | **Enrofloxacin** | 2869 ng/l | | NA | | NA | | NA | | [24] | |
|  | | **Lincomycin** | 1968 ng/l | | NA | | NA | | NA | | [24] | |
|  | | **Clindamycin** | 29 ng/l | | NA | | NA | | NA | | [24] | |
|  | | **Tylosin** | 1500 ng/l | | NA | | NA | | NA | | [30] | |
| **MARINE WATER** | | | | | | | | | | | | |
| **S. No.** | **Anti-microbials** | | | **Concentrations** | | **Bacteria** | | **ARGs** | | **Environmental Factors** | | **References** |
|  | **Sulfamethoxazole** | | | 3.0-880 ng/L | | NA | | NA | | NA | | [19,20] |
|  | **Trimethoprim** | | | 2.6-330 ng/L | | NA | | NA | | NA | | [20,21] |
|  | **Sulfadimidine** | | | 0.24- 292 ng/L | | NA | | NA | | NA | | [20] |
|  | **Sulfadiazine** | | | 0.24- 294 ng/L | | NA | | NA | | NA | | [20] |
|  | **Erythromycin** | | | 2.6- 1340 ng/L | | NA | | NA | | NA | | [20] |
|  | **Roxithromycin** | | | 0.96- 630 ng/L | | NA | | NA | | NA | | [20] |
|  | **Azithromycin** | | | 0.32- 2.5 ng/L | | NA | | NA | | NA | | [21] |
|  | **Clarithromycin** | | | 0.34- 2.6 ng/L | | NA | | NA | | NA | | [21] |
|  | **Tetracycline** | | | 12,340 ng/L | | NA | | NA | | NA | | [29] |
|  | **NA** | | | NA | | *Alteromonas,*  *Vibrio, Acinetobacter, Nautella, Pseudo-alteromonas, Phaeobacter* | | *sul3, sul1, sul2, tetQ, tetW, tetX, tetB, tetO, tetA* | | NA | | [31] |
|  | **NA** | | | NA | | NA | | *tetA, ermB, sul2, blaCTXM, qnrS,* | | czcA (cadmium‑zinc‑cobalt resistance gene) | | [32] |
|  | **NA** | | | NA | | *Gammaproteobacteria* | | *OTC, SMX, sul1, sul2, sul3, tetM* | | NA | | [33] |
|  | **NA** | | | NA | | Cyanobacteria, Proteobacteria, Bacteroidetes, Actinobacteria, Chloroflexi, Planctomycetes, Acidobacteria, Firmicutes, Fusobacteria, Spirochetes, Chlamydiae etc. | | *Sul1, sul2,qnrA, qnrD, qnrS, cmlA, floR* | | Total organic carbon, Dissolved organic carbon, Suspended solids, Chemical oxygen demand, Ammonia nitrogen, Nitrate nitrogen, Nitrite nitrogen, Total alkalinity, Silicate | | [34] |
|  | **NA** | | | NA | | NA | | *blaTEM-B,*  *blaTEM-P,*  *blaSHV-B,*  *qnrS-B,*  *qnrS-P,*  *sul1-B,*  *sul1-P,* | | NA | | [35] |
|  | **NA** | | | NA | | NA | | *tetB, tetc, tetM, tetQ, ermA, ermB, sul1, sul2, sul3, blaNDM-1, ampC, blaTEM, qnrA, aadA, catA, rpo B, dfrA1, vanA, kat* | | NA | | [36] |
|  | **NA** | | | NA | | NA | | *flor, sul1, sul2, tetB, tetM, qnrS and ermB* | | pH, Temperature, Salinity, Dissolved oxygen, Molybdate-reactive phosphorus, Chemical oxygen demand, Dissolved inorganic nitrogen, Ammonium nitrogen, Nitrate nitrogen, Nitrite nitrogen, | | [37] |

NA: Not applicable

Note: Fresh Water (Ground water, Surface water, River, Ponds, Lakes, Streams)

| **Supplementary File 3B: Different key words used for this study.** | |
| --- | --- |
| **S. No.** | **Key words** |
| 1. | "Antimicrobial" and "antibiotic resistance gene "and "water" |
| 2. | "Antimicrobial" and "antibiotic resistance gene" and "freshwater", |
| 3. | "Antibiotic" and "antibiotic resistance gene" and "water", |
| 4. | "Antibiotic" and "antibiotic resistance gene" and "freshwater" |
| 5. | "Antimicrobial" and "Antimicrobial resistance gene" and "water" |
| 6. | "Antimicrobial" and "Antimicrobial resistance gene" and "freshwater" |
| 7. | "Antimicrobial" and "antibiotic resistance gene" and "Marine water" |
| 8. | "Antibiotic" and "antibiotic resistance gene" and "Marine water" |
| 9. | "Antimicrobial" and "Antimicrobial resistance gene" and "Marine water" |
| 10. | "Antimicrobials" and "Antibiotic resistance gene" and "environmental factors" and "water" |
| 11. | "Antibiotics" and "Antibiotic resistance gene" and "environmental factors" and "water" |
| 12. | "Antimicrobials" and "Antibiotic resistance gene" and "environmental factors" and "freshwater" |
| 13. | "Antibiotics" and "Antibiotic resistance gene" and "environmental factors" and "water bodies" |
| 14. | "Antimicrobials" and "Antimicrobial resistance gene" and "environmental factors" and "water bodies" |
| 15. | "Antimicrobials" and "Antibiotic resistance gene" and "Heavy metals" and "water" |
| 16. | "Antimicrobials" and "Antibiotic resistance gene" and "Heavy metals" and "water bodies" |
| 17. | "Antibiotics" and "Antibiotic resistance gene" and "Pollutants" and "water" |
| 18. | "Antibiotics" and "Antibiotic resistance gene" and "Pollutants" and "water bodies" |
| 19. | "Antibiotics" and "Antibiotic resistance gene" and "Pollutants" and "water bodies" |
| 20. | "Antimicrobials" and "Antibiotic resistance gene" and "Pollutants" and "water" |
| 21. | "Antimicrobials" and "Antibiotic resistance gene" and "Pollutants" and "water bodies" |

**References:**

1. Felis E, Kalka J, Sochacki A, Kowalska K, Bajkacz S, Harnisz M, Korzeniewska E. Antimicrobial pharmaceuticals in the aquatic environment-occurrence and environmental implications. European Journal of Pharmacology. 2020 Jan 5;866:172813.
2. Tahrani, L., Van Loco, J., Ben Mansour, H., Reyns, T., 2015. Occurrence of antibiotics in pharmaceutical industrial wastewater, wastewater treatment plant and sea waters in Tunisia. J. Water Health 14, 208–213. <https://doi.org/10.2166/wh.2015.224>.
3. Szekeres E, Chiriac CM, Baricz A, Szőke-Nagy T, Lung I, Soran ML, Rudi K, Dragos N, Coman C. Investigating antibiotics, antibiotic resistance genes, and microbial contaminants in groundwater in relation to the proximity of urban areas. Environmental Pollution. 2018 May 1;236:734-44.
4. Palli L, Spina F, Varese GC, Vincenzi M, Aragno M, Arcangeli G, Mucci N, Santianni D, Caffaz S, Gori R. Occurrence of selected pharmaceuticals in wastewater treatment plants of Tuscany: An effect-based approach to evaluate the potential environmental impact. International journal of hygiene and environmental health. 2019 May 1;222(4):717-25.
5. Gros M, Rodríguez-Mozaz S, Barceló D. Rapid analysis of multiclass antibiotic residues and some of their metabolites in hospital, urban wastewater and river water by ultra-high-performance liquid chromatography coupled to quadrupole-linear ion trap tandem mass spectrometry. Journal of Chromatography A. 2013 May 31;1292:173-88.
6. Ribeiro AR, Sures B, Schmidt TC. Cephalosporin antibiotics in the aquatic environment: A critical review of occurrence, fate, ecotoxicity and removal technologies. Environmental pollution. 2018 Oct 1;241:1153-66.
7. Li B, Zhang T. Mass flows and removal of antibiotics in two municipal wastewater treatment plants. Chemosphere. 2011 May 1;83(9):1284-9.
8. Cabeza Y, Candela L, Ronen D, Teijon G. Monitoring the occurrence of emerging contaminants in treated wastewater and groundwater between 2008 and 2010. The Baix Llobregat (Barcelona, Spain). Journal of hazardous materials. 2012 Nov 15;239:32-9.
9. Tran NH, Chen H, Reinhard M, Mao F, Gin KY. Occurrence and removal of multiple classes of antibiotics and antimicrobial agents in biological wastewater treatment processes. Water Research. 2016 Nov 1;104:461-72.
10. Ma Y, Li M, Wu M, Li Z, Liu X. Occurrences and regional distributions of 20 antibiotics in water bodies during groundwater recharge. Science of the Total Environment. 2015 Jun 15;518:498-506.
11. Tran NH, Hoang L, Nghiem LD, Nguyen NM, Ngo HH, Guo W, Trinh QT, Mai NH, Chen H, Nguyen DD, Ta TT. Occurrence and risk assessment of multiple classes of antibiotics in urban canals and lakes in Hanoi, Vietnam. Science of The Total Environment. 2019 Nov 20;692:157-74.
12. de Jesus Gaffney V, Almeida CM, Rodrigues A, Ferreira E, Benoliel MJ, Cardoso VV. Occurrence of pharmaceuticals in a water supply system and related human health risk assessment. Water research. 2015 Apr 1;72:199-208.
13. Hanna N, Sun P, Sun Q, Li X, Yang X, Ji X, Zou H, Ottoson J, Nilsson LE, Berglund B, Dyar OJ. Presence of antibiotic residues in various environmental compartments of Shandong province in eastern China: its potential for resistance development and ecological and human risk. Environment international. 2018 May 1;114:131-42.
14. Wang X, Gu J, Gao H, Qian X, Li H. Abundances of clinically relevant antibiotic resistance genes and bacterial community diversity in the Weihe River, China. International journal of environmental research and public health. 2018 Apr;15(4):708.
15. Xu W, Yan W, Li X, Zou Y, Chen X, Huang W, Miao L, Zhang R, Zhang G, Zou S. Antibiotics in riverine runoff of the Pearl River Delta and Pearl River Estuary, China: concentrations, mass loading and ecological risks. Environmental Pollution. 2013 Nov 1;182:402-7.
16. Xu J, Zhang Y, Zhou C, Guo C, Wang D, Du P, Luo Y, Wan J, Meng W. Distribution, sources and composition of antibiotics in sediment, overlying water and pore water from Taihu Lake, China. Science of the Total Environment. 2014 Nov 1;497:267-73.
17. Xu L, Ouyang W, Qian Y, Su C, Su J, Chen H. High-throughput profiling of antibiotic resistance genes in drinking water treatment plants and distribution systems. Environmental Pollution. 2016 Jun 1;213:119-26.
18. Azanu D, Styrishave B, Darko G, Weisser JJ, Abaidoo RC. Occurrence and risk assessment of antibiotics in water and lettuce in Ghana. Science of the Total Environment. 2018 May 1;622:293-305.
19. Vilca FZ, Angeles WG (2018) Occurrence of Antibiotics Residues in the Marine Environment. Examines Mar Biol Ocean 2:12–14. https://doi.org/10.31031/EIMBO.2018.02.000536
20. Zhang R, Tang J, Li J, Cheng Z, Chaemfa C, Liu D, Zheng Q, Song M, Luo C, Zhang G. Occurrence and risks of antibiotics in the coastal aquatic environment of the Yellow Sea, North China. Science of the Total Environment. 2013 Apr 15;450:197-204.
21. Zhang R, Zhang G, Zheng Q, Tang J, Chen Y, Xu W, Zou Y, Chen X. Occurrence and risks of antibiotics in the Laizhou Bay, China: impacts of river discharge. Ecotoxicology and Environmental Safety. 2012 Jun 1;80:208-15.
22. Xu W, Zhang G, Zou S, Ling Z, Wang G, Yan W. A preliminary investigation on the occurrence and distribution of antibiotics in the Yellow River and its tributaries, China. Water Environment Research. 2009 Mar;81(3):248-54.
23. Zhang R, Tang J, Li J, Cheng Z, Chaemfa C, Liu D, Zheng Q, Song M, Luo C, Zhang G. Occurrence and risks of antibiotics in the coastal aquatic environment of the Yellow Sea, North China. Science of the Total Environment. 2013 Apr 15;450:197-204.
24. Tran NH, Hoang L, Nghiem LD, Nguyen NM, Ngo HH, Guo W, Trinh QT, Mai NH, Chen H, Nguyen DD, Ta TT. Occurrence and risk assessment of multiple classes of antibiotics in urban canals and lakes in Hanoi, Vietnam. Science of The Total Environment. 2019 Nov 20;692:157-74.
25. Kibuye FA, Gall HE, Elkin KR, Ayers B, Veith TL, Miller M, Jacob S, Hayden KR, Watson JE, Elliott HA. Fate of pharmaceuticals in a spray-irrigation system: From wastewater to groundwater. Science of the Total Environment. 2019 Mar 1;654:197-208.
26. Tran NH, Reinhard M, Gin KY. Occurrence and fate of emerging contaminants in municipal wastewater treatment plants from different geographical regions-a review. Water research. 2018 Apr 15;133:182-207.
27. Tran NH, Chen H, Van Do T, Reinhard M, Ngo HH, He Y, Gin KY. Simultaneous analysis of multiple classes of antimicrobials in environmental water samples using SPE coupled with UHPLC-ESI-MS/MS and isotope dilution. Talanta. 2016 Oct 1;159:163-73.
28. Mirzaei R, Yunesian M, Nasseri S, Gholami M, Jalilzadeh E, Shoeibi S, Mesdaghinia A. Occurrence and fate of most prescribed antibiotics in different water environments of Tehran, Iran. Science of the Total Environment. 2018 Apr 1;619:446-59.
29. Minh TB, Leung HW, Loi IH, Chan WH, So MK, Mao JQ, Choi D, Lam JC, Zheng G, Martin M, Lee JH. Antibiotics in the Hong Kong metropolitan area: ubiquitous distribution and fate in Victoria Harbour. Marine Pollution Bulletin. 2009 Jul 1;58(7):1052-62.
30. Guerra P, Kim M, Shah A, Alaee M, Smyth SA. Occurrence and fate of antibiotic, analgesic/anti-inflammatory, and antifungal compounds in five wastewater treatment processes. Science of the Total Environment. 2014 Mar 1;473:235-43.
31. Wu J, Mao C, Deng Y, Guo Z, Liu G, Xu L, Bei L, Su Y, Feng J. Diversity and abundance of antibiotic resistance of bacteria during the seedling period in marine fish cage-culture areas of Hainan, China. Marine pollution bulletin. 2019 Apr 1;141:343-9.
32. Sabatino R, Di Cesare A, Dzhembekova N, Fontaneto D, Eckert EM, Corno G, Moncheva S, Bertoni R, Callieri C. Spatial distribution of antibiotic and heavy metal resistance genes in the Black Sea. Marine Pollution Bulletin. 2020 Nov 1;160:111635.
33. Suzuki S, Nakanishi S, Tamminen M, Yokokawa T, Sato-Takabe Y, Ohta K, Chou HY, Muziasari WI, Virta M. Occurrence of sul and tet (M) genes in bacterial community in Japanese marine aquaculture environment throughout the year: profile comparison with Taiwanese and Finnish aquaculture waters. Science of the Total Environment. 2019 Jun 15;669:649-56.
34. Su H, Hu X, Wang L, Xu W, Xu Y, Wen G, Li Z, Cao Y. Contamination of antibiotic resistance genes (ARGs) in a typical marine aquaculture farm: source tracking of ARGs in reared aquatic organisms. Journal of Environmental Science and Health, Part B. 2020 Mar 3;55(3):220-9.
35. Sala-Comorera L, Nolan TM, Reynolds LJ, Venkatesh A, Cheung L, Martin NA, Stephens JH, Gitto A, O’Hare GM, O’Sullivan JJ, Meijer WG. Bacterial and Bacteriophage Antibiotic Resistance in Marine Bathing Waters in Relation to Rivers and Urban Streams. Frontiers in Microbiology. 2021:2017.
36. Su S, Li C, Yang J, Xu Q, Qiu Z, Xue B, Wang S, Zhao C, Xiao Z, Wang J, Shen Z. Distribution of antibiotic resistance genes in three different natural water bodies-a lake, river and sea. International journal of environmental research and public health. 2020 Jan;17(2):552.
37. Zhang X, Zhang Y, Zhang Q, Liu P, Guo R, Jin S, Liu J, Chen L, Ma Z, Liu Y. Evaluation and analysis of water quality of marine aquaculture area. International Journal of Environmental Research and Public Health. 2020 Jan;17(4):1446.
