# Supplementary material for: Antimicrobials and Antibiotic Resistance Genes in Water Bodies: Pollution, Risk, and Control
Source: Frontiers journal article supplement (doi:10.3389/fenvs.2022.830861), 2022-04-28
Supplement: Table_4.DOCX [file Table_4.DOCX]

| **Supplementary File 4: Different key words and search data base.** | | | | | | |
| --- | --- | --- | --- | --- | --- | --- |
| **S. No.** | **Key Words** | **Number of Articles** | **No. of Articles similar to current study** | **Date** | **Excluded articles includes (Commentary/ Opinion/ Editorials/Book chapters/Preprints/Discussion**  **/Proceedings/Abstracts/Letters** | **Total included Articles in the study** |
| 1. | "Antimicrobial" and "antibiotic resistance gene "and "water" | Web of Science: 05  JSTOR: 12  PubMed: 26 | Web of Science: 02  JSTOR:01  PubMed: 03 | Up to 17h February 2022 | Web of Science: 03  JSTOR:11  PubMed:23 | Web of Science: 01  JSTOR: 01  PubMed: 03 |
| 2. | "Antimicrobial" and "antibiotic resistance gene" and "freshwater" | Web of Science: 01  JSTOR:07  PubMed: 01 | Web of Science: 00  JSTOR:01  PubMed: 00 | Up to 17h February 2022 | Web of Science: 01  JSTOR: 06  PubMed:01 | Web of Science: 00  JSTOR: 01  PubMed: 00 |
| 3. | "Antibiotic" and "antibiotic resistance gene" and "water" | Web of Science: 26  JSTOR: 35  PubMed: 210 | Web of Science: 04  JSTOR: 01  PubMed: 12 | Up to 17h February 2022 | Web of Science: 22  JSTOR: 34  PubMed: 198 | Web of Science: 04  JSTOR: 01  PubMed: 12 |
| 4. | "Antibiotic" and "antibiotic resistance gene" and "freshwater" | Web of Science: 04  JSTOR: 12  PubMed: 16 | Web of Science: 02  JSTOR: 01  PubMed: 03 | Up to 17h February 2022 | Web of Science: 02  JSTOR: 11  PubMed: 13 | Web of Science: 02  JSTOR: 01  PubMed: 03 |
| 5. | "Antimicrobial" and "Antimicrobial resistance gene" and "water" | Web of Science: 32  JSTOR: 01  PubMed: 27 | Web of Science: 03  JSTOR: 00  PubMed: 04 | Up to 17h February 2022 | Web of Science: 29  JSTOR: 01  PubMed: 23 | Web of Science: 03  JSTOR: 00  PubMed: 04 |
| 6. | "Antimicrobial" and "Antimicrobial resistance gene" and "freshwater" | Web of Science: 02  JSTOR: 01  PubMed: 02 | Web of Science: 02  JSTOR: 01  PubMed: 02 | Up to 17h February 2022 | Web of Science: 00  JSTOR: 00  PubMed: 00 | Web of Science: 02  JSTOR: 01  PubMed: 02 |
| 7. | "Antimicrobial" and "antibiotic resistance gene" and "Marine water" | Web of Science: 00  JSTOR: 02  PubMed: 00 | Web of Science: 00  JSTOR: 00  PubMed: 00 | Up to 17h February 2022 | Web of Science: 00  JSTOR: 00  PubMed: 00 | Web of Science: 00  JSTOR: 00  PubMed: 00 |
| 8. | "Antibiotic" and "antibiotic resistance gene" and "Marine water" | Web of Science: 01  JSTOR: 03  PubMed: 01 | Web of Science: 01  JSTOR: 00  PubMed: 01 | Up to 17h February 2022 | Web of Science: 00  JSTOR: 03  PubMed: 00 | Web of Science: 01  JSTOR: 00  PubMed: 01 |
| 9. | "Antimicrobial" and "Antimicrobial resistance gene" and "Marine water" | Web of Science: 00  JSTOR: 00  PubMed: 01 | Web of Science: 00  JSTOR: 00  PubMed: 01 | Up to 17h February 2022 | Web of Science: 00  JSTOR: 00  PubMed: 01  Google Scholar: 12 | Web of Science: 00  JSTOR: 00  PubMed: 01 |
| 10. | "Antimicrobials" and "Antibiotic resistance gene" and "environmental factors" and "water" | Web of Science: 00  JSTOR: 01  PubMed: 00 | Web of Science: 00  JSTOR: 00  PubMed: 00 | Up to 17h February 2022 | Web of Science: 00  JSTOR: 01  PubMed: 00 | Web of Science: 00  JSTOR: 00  PubMed: 00 |
| 11. | "Antibiotics" and "Antibiotic resistance gene" and "environmental factors" and "water" | Web of Science: 06  JSTOR: 11  PubMed: 04 | Web of Science: 04  JSTOR: 00  PubMed: 04 | Up to 17h February 2022 | Web of Science: 02  JSTOR: 11  PubMed: 00 | Web of Science: 04  JSTOR: 00  PubMed: 04 |
| 12. | "Antimicrobials" and "Antibiotic resistance gene" and "environmental factors" and "freshwater" | Web of Science: 00  JSTOR: 01  PubMed: 00 | Web of Science: 00  JSTOR: 00  PubMed: 00 | Up to 17h February 2022 | Web of Science: 00  JSTOR: 01  PubMed: 00 | Web of Science: 00  JSTOR: 00  PubMed: 00 |
| 13. | "Antibiotics" and "Antibiotic resistance gene" and "environmental factors" and "water bodies" | Web of Science: 00  JSTOR: 03  PubMed: 00 | Web of Science: 00  JSTOR: 00  PubMed: 00 | Up to 17h February 2022 | Web of Science: 00  JSTOR: 03  PubMed: 00 | Web of Science: 00  JSTOR: 00  PubMed: 00 |
| 14. | "Antimicrobials" and "Antimicrobial resistance gene" and "environmental factors" and "water bodies" | Web of Science:00  JSTOR: 00  PubMed: 00 | Web of Science: 00  JSTOR: 00  PubMed: 00 | Up to 17h February 2022 | Web of Science: 00  JSTOR: 00  PubMed: 00  Google Scholar: 26 | Web of Science: 00  JSTOR: 00  PubMed: 00 |
| 15. | "Antimicrobials" and "Antibiotic resistance gene" and "Heavy metals" and "water" | Web of Science: 01  JSTOR: 03  PubMed: 01 | Web of Science: 00  JSTOR: 00  PubMed: 00 | Up to 17h February 2022 | Web of Science: 01  JSTOR: 03  PubMed: 01 | Web of Science: 00  JSTOR: 00  PubMed: 00 |
| 16. | "Antimicrobials" and "Antibiotic resistance gene" and "Heavy metals" and "water bodies" | Web of Science: 01  JSTOR: 01  PubMed: 01 | Web of Science: 00  JSTOR: 00  PubMed: 00 | Up to 17h February 2022 | Web of Science: 01  JSTOR: 01  PubMed: 01 | Web of Science: 00  JSTOR: 00  PubMed: 00 |
| 17. | "Antibiotics" and "Antibiotic resistance gene" and "Pollutants" and "water" | Web of Science: 11  JSTOR: 05  PubMed: 17 | Web of Science: 03  JSTOR: 00  PubMed: 06 | Up to 17h February 2022 | Web of Science: 00  JSTOR: 05  PubMed: 11 | Web of Science: 03  JSTOR: 00  PubMed: 06 |
| 18. | "ARGs" and "Environmental factors" | Web of Science: 99  PubMed: 99  JSTOR: 21 | Web of Science: 11  PubMed: 13  JSTOR: 00 | Up to 17h February 2022  JSTOR: 00 | Web of Science: 88  PubMed: 86  JSTOR: 21 | Web of Science: 11  PubMed: 13  JSTOR: 00 |
| 19. | "Antibiotics" and "Antibiotic resistance gene" and "Pollutants" and "water bodies" | Web of Science: 01  JSTOR: 03  PubMed: 01 | Web of Science: 01  JSTOR: 00  PubMed: 00 | Up to 17h February 2022 | Web of Science: 00  JSTOR: 03  PubMed: 01 | Web of Science: 01  JSTOR: 00  PubMed: 00 |
| 20. | "Antibiotics" and "Antibiotic resistance gene" and "Pollutants" and "water bodies" | Web of Science: 01  JSTOR: 03  PubMed:01 | Web of Science: 01 JSTOR: 00  PubMed: 00 | Up to 17h February 2022 | Web of Science: 01  JSTOR: 03  PubMed: 01 | Web of Science: 01 JSTOR: 00  PubMed: 00 |
| 21. | "Antimicrobials" and "Antibiotic resistance gene" and "Pollutants" and "water" | Web of Science: 01  JSTOR: 07  PubMed:01 | Web of Science: 01  JSTOR: 00  PubMed:00 | Up to 17h February 2022 | Web of Science: 00  JSTOR: 07  PubMed: 01 | Web of Science: 01  JSTOR: 00  PubMed:00 |
| 22. | "Antimicrobials" and "Antibiotic resistance gene" and "Pollutants" and "water bodies" | Web of Science: 06  JSTOR: 03  PubMed:01 | Web of Science: 01  JSTOR: 00  PubMed:00  Google | Up to 17h February 2022 | Web of Science: 05  JSTOR: 03  PubMed: 01 | Web of Science: 01  JSTOR: 00  PubMed:00 |
